# Supplementary material for: Sex-specific resilience of neocortex to food restriction
Source: eLife. 2024 Jul 8;12:RP93052. doi: 10.7554/eLife.93052 (PMC11230624; doi:10.7554/eLife.93052)
Supplement: Supplementary file 1. — Gene Set Enrichment Analysis (GSEA) to identify pathways enriched in the populations differentially expressed in food restricted animals compared to controls. We found that food restriction resulted in a significant alteration of 34 gene sets (at p-adj <0.05) in males; 13 of these were common to both sexes. n = 4 CTR male, n = 4 FR male mice. [file elife-93052-supp1.xlsx]

## Sheet: gsea_datamalhall
Supplementary File 1. Hallmark gene sets, Male food deprived versus control
	Name	gene.NO	stat	pvalue	padj	gene_names
1	HALLMARK_OXIDATIVE_PHOSPHORYLATION	198	0.486362	0	0	Ndufv1|Cyb5r3|Pdp1|Retsat|Atp5a1|Uqcrc1|Ldhb|Atp5b|Mrps22|Ndufa9|Fh1|Surf1|Sdhb|Suclg1|Uqcrc2|Oat|Mdh2|Aldh6a1|Acaa2|Idh2|Cyc1|Atp6v1h|Etfb|Mgst3|Bdh2|Dld|Atp6v1e1|Mrpl15|Pdhx|Ndufs2|Alas1|Sdhd|Immt|Cox6a1|Acadsb|Abcb7|Glud1|Atp5g3|Ndufa2|Cox4i1|Iscu|Cox11|Gpx4|Ndufb8|Idh3a|Hspa9|Atp1b1|Bckdha|Slc25a20|Ndufs7|Slc25a4|Ndufs1|Slc25a5|Atp5j|Gpi1|Fdx1|Sdha|Atp5c1|Mrps30|Mdh1|Eci1|Polr2f|Ndufa8|Acadm|…
2	HALLMARK_EPITHELIAL_MESENCHYMAL_TRANSITION	187	0.49103	0	0	Mgp|Serpinh1|Vim|Ccn2|Sparc|Acta2|Pcolce|Scg2|Sntb1|Fstl1|Dcn|Foxc2|Timp3|Myl9|Fuca1|Lum|Col6a2|Fbln5|Col8a2|Msx1|Calu|Itgb1|Tgm2|Tgfbi|Dab2|Emp3|Nt5e|Tnfrsf11b|Tpm2|Serpine2|Thbs2|Spp1|Plod1|Bgn|Sfrp1|Vcam1|Igfbp3|Efemp2|Col1a1|Col1a2|Cald1|Lamc2|Igfbp4|Gja1|Pthlh|Gadd45a|Anpep|Fmod|Fap|Prrx1|Rhob|Capg|Gpx7|Mcm7|Cadm1|Tnfrsf12a|Lama2|Lgals1|Igfbp2|Thbs1|Fbln1|Gas1|Col3a1|Cxcl12|Fn1|Pcolce2|Postn…
3	HALLMARK_INTERFERON_GAMMA_RESPONSE	173	0.484282	0	0	Ifit3|Ifitm2|Fgl2|Plscr1|H2-D1|Psme1|H2-Aa|Cd74|Txnip|St8sia4|Eif2ak2|Isoc1|Tnfsf10|Irf8|Serping1|Irf7|Ube2l6|Tnfaip6|Psmb10|Ifitm3|Il4ra|Ifi35|Fcgr1|Isg15|Samd9l|Cfh|Vcam1|Sspn|Pla2g4a|Ifih1|Nmi|Isg20|Gbp9|Ptpn6|Tapbp|Ifit2|Bst2|Lgals3bp|Nampt|H2-Eb1|Bpgm|Ifi30|Ifnar2|Rtp4|Pde4b|Hif1a|Cmpk2|Vamp5|Icam1|Stat3|Sri|Btg1|Jak2|Usp18|Psma2|Arl4a|Lap3|Mt2|Epsti1|Parp14|Vamp8|Trim26|Cdkn1a|B2m|Casp8|Nod…
4	HALLMARK_APOPTOSIS	150	0.481707	0	0	Ier3|Ifngr1|Gsn|Dcn|Hspb1|Timp3|Lum|Txnip|Cav1|Anxa1|Retsat|Emp1|Tnfsf10|Sod1|Plat|Dnajc3|Ebp|Sqstm1|Gpx3|Ifitm3|Gstm2|Cflar|Igfbp6|Bgn|Bcap31|Pmaip1|Ctnnb1|Isg20|Tspo|Lef1|Fez1|Nefh|Gadd45a|Rhob|Gpx4|Pea15a|Cdkn1b|Xiap|Cd14|Tnfrsf12a|Pdcd4|Dnaja1|Ppt1|Nedd9|Birc3|Lmna|Erbb2|Ddit3|Hmox1|Ccnd1|Bcl2l1|Cdkn1a|F2r|Casp8|App|Irf1|Bnip3l|Cdk2|Vdac2|Rhot2|Clu|Ank|Eno2|Gsr|Bcl10|Dap3|Ptk2|Cd38|Casp3|Mgmt…
5	HALLMARK_INTERFERON_ALPHA_RESPONSE	90	0.520803	0	0	Ifit3|Ifitm2|Plscr1|Psme1|Cd74|Gbp2|Txnip|Eif2ak2|Irf7|Ube2l6|Ifitm3|Il4ra|Mvb12a|Ifi35|Isg15|Samd9l|Ifih1|Nmi|Isg20|Ifitm1|Parp9|Ifit2|Bst2|Lgals3bp|Ifi30|Elf1|Rtp4|Cmpk2|Usp18|Lap3|Epsti1|Parp14|Cnp|Ncoa7|Trim26|B2m|Casp8|Psme2|Ogfr|Irf1|Rsad2|Slc25a28|Tent5a|Psmb8|Tdrd7|Sp110|Gmpr|Psmb9|Parp12|Gbp3|Nub1|Lpar6|Csf1|Tap1|Trim25|Psma3|Ifi27|Trim21|Casp1|Trim12c|Irf2|Adar|Mx2|Pnpt1|Rnf31|Ripk2|Mov…
6	HALLMARK_COAGULATION	101	0.508011	0	0	Sparc|Ctsh|Gsn|Lefty2|Timp3|Cpq|Anxa1|Pecam1|Trf|Lgmn|Hmgcs2|Plat|Serping1|Ctso|Ctsl|F3|Ctsb|Lamp2|Cfh|C2|Msrb2|Vwf|Pros1|Csrp1|Iscu|Mmp9|Thbd|Cd9|Ang|Dusp14|Mmp11|Thbs1|Pef1|Arf4|Adam9|Pf4|Rac1|Crip2|Prss23|Fn1|Htra1|Mmp15|S100a13|Plek|Pdgfb|Clu|Mmp14|Ctsk|C1qa|Rabif|Furin|Itgb3|Wdr1|P2ry1|Gng12|A2m|Dusp6|Casp9|Lta4h|Sirt2|S100a1|Maff|Fyn|Gnb2|Capn2|Plau|Prep|Gda|Sh2b2|Bmp1|Dpp4|Klk8|Rapgef3|Lrp…
7	HALLMARK_MTORC1_SIGNALING	199	0.457172	0	0	Sdf2l1|Hspa5|Slc7a11|Serpinh1|Fgl2|Gla|Ctsc|Xbp1|Adipor2|Phgdh|Slc2a1|Psph|Psmd13|Lgmn|Calr|Uchl5|Rpn1|Glrx|Pitpnb|Ebp|Rpa1|Gbe1|Sqstm1|Psmb5|Pgk1|Stip1|Psmd12|Psmc2|Cct6a|Aldoa|Sec11a|Psat1|Hsp90b1|Sord|Psmd14|M6pr|Tes|Fkbp2|Niban1|Uso1|Slc6a6|Immt|Pdap1|Pik3r3|G6pdx|Actr3|Fads2|Tpi1|P4ha1|Nampt|Psmc4|Abcf2|Canx|Cacybp|Got1|Slc7a5|Pgm1|Hspa9|Nfkbib|Ppa1|Prdx1|Ifi30|Gapdh|Hprt|Bhlhe40|Nupr1|Psmg1…
8	HALLMARK_HYPOXIA	185	0.459706	0	0	Cdkn1c|Hspa5|Anxa2|Efna1|Cavin1|Ccn2|Ier3|Dcn|Cp|Slc2a1|Cav1|Adm|Prdx5|Tgm2|Tgfbi|Glrx|F3|Gbe1|Mxi1|Klf6|Sdc2|Pgk1|Ilvbl|Aldoa|Ndrg1|Aldoc|Bgn|Ccng2|Igfbp3|Zfp36|Tes|Isg20|Pam|Gpc3|Galk1|Tpd52|Grhpr|Cited2|Pygm|Slc6a6|Tpi1|P4ha1|Angptl4|Csrp2|Nr3c1|Tpbg|Pgm1|Cavin3|Gapdh|Cdkn1b|Bhlhe40|Gpi1|Ppp1r15a|Dusp1|Rora|Vhl|Stbd1|Btg1|Tgfb3|Ugp2|Pnrc1|Mt2|Ddit3|Klhl24|Mt1|Hmox1|Ets1|Cdkn1a|Slc2a3|Rbpj|Ldha…
9	HALLMARK_KRAS_SIGNALING_UP	183	0.454718	0	0	Apod|Ace|Tnnt2|F13a1|Nap1l2|Fuca1|Scg5|Pecam1|Adgrl4|Emp1|Tfpi|Cpe|Plat|Irf8|Flt4|Glrx|Sparcl1|C3ar1|Sema3b|Vwa5a|Rgs16|Cfh|Spp1|Avl9|Pcsk1n|Crot|Igfbp3|Eng|Spry2|Abcb1a|Gypc|Tmem176b|Angptl4|Prrx1|Cab39l|Klf4|Mmp9|Aldh1a2|Bpgm|Trib2|Gng11|Il33|Hsd11b1|Mpzl2|Ppp1r15a|Mmp11|Lcp1|Birc3|Prkg2|Spon1|Ctss|Ets1|Yrdc|Scg3|Etv5|Gprc5b|St6gal1|Ptcd2|Mafb|Scn1b|Trib1|Igf2|Jup|Rbp4|Plaur|Gabra3|Btbd3|Ank|Pt…
10	HALLMARK_ANGIOGENESIS	32	0.63894	0	0	Pglyrp1|Vtn|Kcnj8|Fstl1|Lum|Msx1|Spp1|Lrpap1|Thbd|Pf4|Col3a1|Postn|App|Ptk2|Pdgfa|Fgfr1|Itgav|Nrp1|Col5a2|Tnfrsf21|Jag1|Stc1|Vcan|Ccnd2|Vav2|Jag2|Slco2a1|Vegfa|Lpl
11	HALLMARK_XENOBIOTIC_METABOLISM	163	0.453393	0	0	Ddc|Apoe|Spint2|Pink1|Vtn|Nqo1|Ptgds|Hes6|Maoa|Retsat|Tnfrsf1a|Cyp4f15|Gstt2|Irf8|Gart|Ahcy|Ssr3|Psmb10|Fmo1|Kars|Asl|Dhrs7|Crot|Cdo1|Adh5|Epha2|Cyp2j9|Ptges|Alas1|Slc6a6|Igfbp4|Pros1|Tmem176b|Aldh9a1|Cyp4f14|Cndp2|Gabarapl1|Pgd|Pgrmc1|Aldh2|Gss|Dhps|Akr1c18|Hprt|Hsd11b1|Aox1|Gsto1|Cyp2s1|Ech1|Gnmt|Tmbim6|Ptges3|Fbln1|Pdlim5|Npc1|Acox3|Mt2|Hmox1|Gad1|Gstm4|Aldh3a1|Blvrb|Slc12a4|Pcx|Gclc|Pmm1|Ddah…
12	HALLMARK_ADIPOGENESIS	195	0.430137	0	0	Apoe|Cavin1|Cd151|Omd|Sult1a1|Ifngr1|Cavin2|Adipor2|Itih5|Slc5a6|Retsat|Uqcrc1|Sowahc|Sod1|Ucp2|Dnajb9|Sparcl1|Gbe1|Gpx3|Mtarc2|Sdhb|Suclg1|Esyt1|Aldoa|Pex14|Mdh2|Acaa2|Cyc1|Etfb|Dhrs7|Mgst3|Stom|Ccng2|Sspn|Dld|Hspb8|Mrpl15|Immt|Atp1b3|Cox6a1|Tkt|Gadd45a|Angptl4|Nkiras1|Hadh|Gpx4|Pgm1|Idh3a|Cpt2|Bckdha|Scp2|Aldh2|Esrra|Ubc|Fzd4|Pdcd4|Taldo1|Acadm|Ech1|Stat5a|Acads|Enpp2|Dlat|Ndufa5|Ndufs3|Arl4a|J…
13	HALLMARK_IL2_STAT5_SIGNALING	182	0.43023	0	0	Cdkn1c|Ifngr1|Fgl2|Plscr1|Xbp1|Itih5|Pth1r|Emp1|Tnfsf10|Cd83|Prkch|Syngr2|Tgm2|Irf8|Prnp|Ahnak|Ahcy|She|Nt5e|Klf6|Ifitm3|Il4ra|Slc39a8|Rgs16|Ndrg1|Odc1|Spp1|Cd81|Abcb1a|Smpdl3a|Ptrh2|P4ha1|Map3k8|Rnh1|Dcps|Rhob|Gabarapl1|Gpx4|Capg|Wls|Pdcd2l|Ccnd3|Pus1|Gucy1b1|Anxa4|Phlda1|Umps|Bhlhe40|Twsg1|Lrig1|Gsto1|Rora|Glipr2|Myo1c|Arl4a|Penk|Ctsz|Bcl2l1|Irf6|Snx14|Slc2a3|Cish|Aplp1|Plpp1|Tlr7|Map6|Cdc42se2…
14	HALLMARK_FATTY_ACID_METABOLISM	141	0.431113	0	9.82e-05	Inmt|Psme1|Maoa|Adipor2|Retsat|Nthl1|Hmgcs2|Cbr3|Ube2l6|Fh1|Suclg1|Aldoa|Fmo1|Hsd17b11|Mdh2|Adsl|Odc1|Acaa2|Suclg2|Dld|Hpgd|Grhpr|Sdhd|Hsd17b4|Serinc1|Gpd1|Aldh9a1|Acot2|Gabarapl1|Hadh|Cpt2|Bckdhb|Ncaph2|Blvra|Sdha|Mdh1|Mlycd|Lgals1|Alad|Eci1|Hsp90aa1|Auh|Acadm|Ech1|Acads|Urod|Rdh11|Nbn|Glul|Erp29|Ywhah|Eci2|Acadl|Sdhc|Hadhb|Aldh3a1|Cpox|Cpt1a|Ostc|Ldha|Decr1|Cbr1|Aco2|Sucla2|Bmpr1b|Acsl5|Mif|Eph…
15	HALLMARK_MYC_TARGETS_V1	200	0.409606	0	0.000105	Srsf3|Cct3|Cct7|Prdx4|Fbl|Psmb3|Psmd7|Eif3j1|Snrpd3|Eif3d|Bub3|Cct4|Pole3|Psmd1|Uba2|Pgk1|Rrm1|Ssb|Kars|Tcp1|Odc1|Psmd14|Cyc1|Cct5|Pold2|Pa2g4|Tra2b|Hsp90ab1|Pcna|Rpl18|Impdh2|Phb|Cnbp|Psmc4|Canx|Exosc7|Cct2|Pcbp1|Ddx21|Ran|Psma6|Mcm7|Rpl14|Cbx3|Hprt|Usp1|Set|Ilf2|Snrpa1|Eif1ax|Nop16|C1qbp|Rplp0|Mcm5|Ppia|Eif3j2|Ptges3|Psma2|Vdac3|G3bp1|Rps3|Ruvbl2|Rps5|Rps2|Psmd8|U2af1|Ncbp1|Hnrnpc|Ppm1g|Hnrnpa3…
16	HALLMARK_TGF_BETA_SIGNALING	54	0.526317	0	0.000112	Cdkn1c|Id1|Id3|Lefty2|Rhoa|Ctnnb1|Eng|Fnta|Smad6|Ppp1ca|Xiap|Ppp1r15a|Thbs1|Wwtr1|Rab31|Bmpr1a|Ube2d3|Hdac1|Junb|Nog|Hipk2|Cdh1|Ppm1a|Furin|Tgif1|Tjp1|Id2|Smurf2|Cdk9|Bmp2|Smad3|Map3k7|Tgfb1|Ski|Tgfbr1|Trim33|Fkbp1a|Arid4b|Smad7|Smad1|Sptbn1|Bmpr2|Bcar3|Klf10|Ncor2|Ifngr2|Acvr1|Skil|Smurf1|Apc|Pmepa1|Slc20a1
17	HALLMARK_UV_RESPONSE_UP	149	0.396465	0	0.000916	Cdkn1c|Sult1a1|Hspa13|Maoa|Creg1|Msx1|Eif2s3x|Rpn1|Fkbp4|Ctsl|Sqstm1|Gpx3|Psmc3|Pole3|Stip1|Aldoa|Fmo1|Cdc5l|Cdo1|Bsg|Ret|Abcb1a|Alas1|Pdap1|Lyn|Il6st|H2-Q1|Rhob|Cltb|Ppp1r2|Ccnd3|Ddx21|Hspa2|Slc25a4|Amd1|Igfbp2|Dnaja1|Ykt6|Icam1|Ppt1|Btg1|Urod|Ap2s1|Tmbim6|H2ax|Hyal2|Grpel1|Hmox1|Cnp|Htr7|Atp6v1c1|Tuba4a|Mapk8ip2|Junb|Eif5|Plcl1|Spr|Irf1|Rfc4|Cdk2|Mrpl23|Slc6a12|Ephx1|Mmp14|Eno2|Polr2h|Klhdc3|Nf…
18	HALLMARK_ESTROGEN_RESPONSE_LATE	175	0.388714	0	0.00132722	Foxc1|Perp|Lsr|Gla|Xbp1|Myof|Cav1|Cyp4f15|Fkbp5|Ass1|Cpe|Hmgcs2|Fkbp4|Mdk|Sema3b|Chst8|Sord|Idh2|Etfb|Zfp36|Hspb8|Isg20|Ret|Ptpn6|Ckb|Ptges|Plaat3|Amfr|Lamc2|Igfbp4|Scnn1a|Il6st|Cyp4f14|Nbl1|Klf4|Slc7a5|Tpbg|Sgk1|Cxcl14|Dnajc12|Rps6ka2|Fabp5|Hprt|Cd9|Npy1r|Itpk1|Pdcd4|Slc16a1|Jak2|Gper1|Rab31|Add3|Slc9a3r1|Kcnk5|Prss23|Rnaseh2a|Ascl1|Ccnd1|Cxcl12|Blvrb|Arl3|Cish|Mill2|Sox3|Tpd52l1|Dusp2|Fgfr3|Bcl…
19	HALLMARK_INFLAMMATORY_RESPONSE	156	0.385208	0	0.00173941	Calcrl|Vip|Eif2ak2|Tnfsf10|Sphk1|Adm|Sgms2|Pdpn|Axl|Irf7|F3|Emp3|C3ar1|Ptafr|Tnfaip6|Klf6|Il4ra|Rgs16|Selenos|Nmi|Gpc3|Slc31a1|Ifitm1|Tapbp|Bst2|Lyn|Edn1|Nampt|Tpbg|Adgre1|Ccl17|Rtp4|Slc7a2|Cd14|Pde4b|Gnai3|Hif1a|Icam1|Sri|Adrm1|Kif1b|Abi1|Itgb8|Cdkn1a|Cd82|Osmr|Scn1b|Irf1|Tlr2|Ifnar1|Plaur|Best1|Mmp14|P2rx4|Slc4a4|Tacr1|Nfkbia|Itgb3|Slc31a2|Rhog|Itga5|Psen1|Cd55|Hrh1|Rnf144b|Lpar1|Il10ra|Tacr3|G…
20	HALLMARK_HEME_METABOLISM	173	0.375874	0	0.00205976	Alas2|Slc7a11|Bcam|Abcg2|Slc2a1|Ucp2|Kat2b|Cir1|Mxi1|Slc66a2|Ctsb|Lamp2|Aldh6a1|Epor|Mgst3|Slc25a38|Ncoa4|Cast|Bsg|Mospd1|Sdcbp|Gypc|Agpat4|Lmo2|Nr3c1|Hbb-bt|Bach1|Mkrn1|Ccnd3|Bpgm|Vezf1|Blvra|Glrx5|Alad|Nudt4|Igsf3|Aldh1l1|Mpp1|Urod|Nfe2l1|Fbxo7|Tcea1|Tspan5|Psmd9|Htatip2|Tns1|Lrp10|Ell2|Epb41|Endod1|Cpox|Blvrb|Narf|Gmps|Mark3|Rcl1|Pcx|Gclc|Cdr2|Hagh|Bnip3l|Top1|Dcaf10|Ank1|Mboat2|Adipor1|Clcn3|…
21	HALLMARK_ALLOGRAFT_REJECTION	151	0.381069	0	0.00240783	H2-T23|Ifngr1|H2-Aa|Cd74|Gbp2|Spi1|St8sia4|Irf8|Irf7|Eif3j1|Eif3d|Psmb10|Il4ra|Cd4|C2|Rars|Fcgr2b|Ptpn6|Tapbp|Tpd52|Lyn|Rps9|Srgn|Eif5a|Mmp9|Capg|Cd7|Ccnd3|Degs1|Ifnar2|Rpl39|Krt1|Ly75|Apbb1|Tap2|Hif1a|Icam1|Ccr5|Rps19|Jak2|Eif3j2|Pf4|Nck1|Galnt1|Ctss|Akt1|Ets1|Abi1|Hcls1|B2m|F2r|Il12a|Tlr2|Npm1|Socs5|Bcl10|Rps3a1|Rpl9|Was|H2-DMb1|Dars|Fyb|Csk|Ube2n|Abce1|Lif|Inhbb|Glmn|Bcat1|Itgal|Itgb2|Aars|Csf…
22	HALLMARK_PROTEIN_SECRETION	94	0.411593	0	0.00246262	Sgms1|Gla|Ctsc|Sod1|Cd63|Tsg101|Tmx1|Lamp2|Atp6v1h|Sspn|M6pr|Copb2|Pam|Clta|Uso1|Rab5a|Vps45|Tpd52|Stx7|Anp32e|Ergic3|Copb1|Tmed2|Arcn1|Arf1|Ykt6|Adam10|Ppt1|Rer1|Stx12|Ap2s1|Tmed10|Kif1b|Vps4b|Cav2|Cope|Snx2|Sec31a|Vamp4|Lman1|Sec22b|Vamp3|Scamp1|Stam|Cln5|Clcn3|Gosr2|Snap23|Napa|Atp7a|Rab2a|Galc|Arfgap3|Yipf6|Ap2m1|Tom1l1|Dop1a|Bet1|Ap1g1|Bnip3|Rab22a|Rab9|Cltc|Rab14|Arfip1|Sh3gl2|Scrn1|Zw10|Ar…
23	HALLMARK_NOTCH_SIGNALING	32	0.5123	0.00566038	0.00254381	Lfng|Fzd7|Hes1|Tcf7l2|Fzd1|St3gal6|Notch3|Psenen|Rbx1|Ccnd1|Fbxw11|Ppard|Cul1|Wnt5a|Skp1|Dtx1|Aph1a|Notch1|Wnt2|Arrb1|Fzd5|Heyl|Dtx4|Maml2|Notch2|Sap30|Psen2|Jag1|Dll1|Dtx2|Kat2a|Prkca
24	HALLMARK_REACTIVE_OXYGEN_SPECIES_PATHWAY	48	0.464186	0.00759013	0.00258844	Lsp1|Nqo1|Prdx4|Sod1|Prnp|Glrx|Ptpa|Gpx3|Pdlim1|Cdkn2d|Selenos|Ftl1|Ndufs2|Mgst1|G6pdx|Gpx4|Prdx1|Msra|Hmox2|Egln2|Txnrd1|Gclc|Junb|Ndufa6|Mbp|Ndufb4|Gsr|Srxn1|Prdx2|Cat|Gclm|Sod2|Txn1|Prdx6|Ipcef1|Pfkp|Atox1|Glrx2|Fes|Stk25|Oxsr1|Txnrd2|Hhex|Sbno2|Lamtor5|Ercc2|Scaf4|Abcc1
25	HALLMARK_ESTROGEN_RESPONSE_EARLY	181	0.361875	0	0.00351029	Foxc1|Gla|Hes1|Xbp1|Podxl|Slc2a1|Myof|Retreg1|Fkbp5|Calb2|Tgm2|Fkbp4|Sema3b|Pmaip1|Hspb8|Ret|Ptges|Plaat3|Amfr|Igfbp4|Tsku|Scnn1a|Gja1|Il6st|Nbl1|Klf4|Slc7a5|Tpbg|Mreg|Tmem164|Rps6ka2|Bhlhe40|Mindy1|Elf1|Slc7a2|Npy1r|Itpk1|Lrig1|Slc16a1|Mybl1|Jak2|Rab31|Zfp185|Add3|Sybu|Lad1|Slc9a3r1|Unc119|Kcnk5|Prss23|Ccnd1|Endod1|Cxcl12|Blvrb|Arl3|Cish|Mill2|Sox3|Tpd52l1|B4galt1|Rhobtb3|Bcl2|Tgif2|Slc39a6|Ttc3…
26	HALLMARK_P53_PATHWAY	194	0.356768	0	0.00376672	Slc7a11|Ier3|Perp|Fuca1|Slc3a2|Txnip|Retsat|Tax1bp3|Sphk1|Hexim1|Tm4sf1|Ier5|Ldhb|Phlda3|Vwa5a|Rgs16|Ndrg1|Dnttip2|Stom|Cd81|Epha2|Sesn1|Pcna|Rpl18|Rxra|Gadd45a|Iscu|Klf4|Cgrrf1|Ccnd3|Ifi30|Rchy1|Plk2|Tsc22d1|Nupr1|Mdm2|Ppp1r15a|Btg1|Rpl36|Blcap|Tnni1|Coq8a|Ddit3|Hmox1|Vamp8|Ei24|Cdkn1a|Mxd4|Rack1|F2r|Pmm1|Rnf19b|Cd82|Tpd52l1|App|H1f2|Ephx1|Ctsf|Ak1|Sertad3|Tm7sf3|Hint1|Ip6k2|Dcxr|Ada|Abat|Aen|Hs…
27	HALLMARK_GLYCOLYSIS	188	0.327538	0.00181159	0.0150634	Hspa5|Ier3|Dcn|Sod1|Akr1a1|Il13ra1|Tgfbi|Fkbp4|Glrx|Mxi1|Nt5e|Sdc2|Pgk1|Aldoa|Mdh2|Plod1|Igfbp3|Dld|Copb2|Prps1|Hs2st1|Rars|Isg20|Pam|Gpc3|Galk1|Nol3|Cited2|G6pdx|Hax1|Tpi1|P4ha1|Aldh9a1|Hs6st2|Angptl4|Psmc4|Pygb|Got1|Tpbg|Pgam1|Chst12|Bpnt1|Mdh1|Taldo1|Ppp2cb|Stmn1|Ppia|Ang|Pkm|Ugp2|Sdhc|Glce|Pygl|Ak3|Ext2|Pcx|Aldh7a1|Gclc|Galk2|Ldha|Got2|B4galt1|Qsox1|Ecd|Mif|Eno1|Eno2|Ero1a|Cyb5a|Gnpda1|Srd5a3…
28	HALLMARK_UV_RESPONSE_DN	143	0.33412	0.00369004	0.0179785	Id1|Anxa2|Cav1|Fbln5|Tfpi|Nr1d2|Mrps31|Efemp1|Dab2|F3|Sdc2|Fzd2|Pex14|Ptgfr|Col1a1|Col1a2|Cited2|Tgfbr2|Pik3r3|Gja1|Rxra|Nr3c1|Bckdhb|Dlg1|Anxa4|Cdkn1b|Bhlhe40|Plpp3|Dusp1|Runx1|Sri|Add3|Wdr37|Pdlim5|Bmpr1a|Rnd3|Erbb2|Mt1|Col3a1|Pmp22|Sfmbt1|Synj2|Dyrk1a|Schip1|Rbpms|Ptprm|Dbp|Itgb3|Magi2|Rgs4|Mios|Mgmt|Tjp1|Lpar1|Tgfbr3|Zmiz1|Igfbp5|Nek7|Lamc1|Ythdc1|Pten|Phf3|Ltbp1|Aggf1|Plcb4|Inpp4b|Pias3|Fyn|…
29	HALLMARK_TNFA_SIGNALING_VIA_NFKB	179	0.320177	0.0070922	0.021182	Efna1|Ier3|Hes1|Cd83|Sphk1|Nfe2l2|Ier5|Rcan1|F3|Tnfaip6|Sqstm1|Klf6|Cflar|Dnajb4|Trip10|Zfp36|Ifih1|Ifit2|Edn1|Map3k8|Nampt|Il6st|Gadd45a|Rhob|Eif1|Klf4|Sgk1|Plk2|Tsc22d1|Phlda1|Bhlhe40|Plpp3|Ppp1r15a|Pde4b|Dusp1|Tubb2a|Icam1|Stat5a|Klf2|Btg1|Birc3|Pdlim5|Tnip1|Pnrc1|B4galt5|Bcl6|Yrdc|Ccnd1|Cdkn1a|Slc2a3|Rnf19b|Junb|Dusp2|B4galt1|Plek|Irf1|Trib1|Sdc4|Nfil3|Tlr2|Plaur|Panx1|Dusp4|Snn|Nfkbia|Spsb1|…
30	HALLMARK_APICAL_JUNCTION	185	0.31562	0.00910747	0.02402	Cldn5|Tspan4|Myl9|Pecam1|Gnai2|Calb2|Itgb1|Cnn2|Lima1|Tgfbi|Flnc|Gtf2f1|Cldn11|Mdk|Icam2|Vasp|Tnfrsf11b|Sgce|Nrtn|Pals1|Vcam1|Msn|Lamc2|Pik3r3|Vwf|Hadh|Pfn1|Mmp9|Grb7|Ctnna1|Jam3|Dlg1|Mpzl2|Skap2|Nexn|Icam1|Actn4|Ldlrap1|Adam9|Ywhah|Shc1|Itga9|Pbx2|Tubg1|Rac2|Map3k20|Gnai1|Taok2|Adra1b|Cd34|B4galt1|Cd274|Jup|Crb3|Mpzl1|Cdh1|Arpc2|Ptk2|Pard6g|Tjp1|Itgb4|Cdh11|Slc30a3|Rsu1|Cdsn|Ikbkg|Fyb|Nectin2|Ad…
31	HALLMARK_IL6_JAK_STAT3_SIGNALING	73	0.358946	0.0307971	0.0257851	Acvrl1|Ifngr1|Il10rb|Tnfrsf1a|Il13ra1|Il4ra|Lepr|Pdgfc|Hax1|Map3k8|Ptpn11|Il6st|Cd9|Cd14|Tnfrsf12a|Stat3|Cntfr|Pf4|Hmox1|Grb2|Osmr|Irf1|Myd88|Tlr2|Ifnar1|Cd38|Itgb3|A2m|Csf1|Fas|Ltbr|Ptpn1|Tgfb1|Pim1|Socs3|Acvr1b|Stam2|Bak1|Stat1|Tnfrsf21|Tnfrsf1b|Cd44|Ptpn2|Il17rb|Crlf2|Ifngr2|Il17ra|Il1r1|Jun|Csf2ra|Cbl|Tyk2|Stat2|Itga4|Il3ra|Pik3r5|Irf9|Il15ra|Csf3r
32	HALLMARK_COMPLEMENT	163	0.319188	0.0127505	0.0286618	Hspa5|Plscr1|Ctsh|Ctsc|Cp|Cpq|Pdp1|Lgmn|Gnai2|Plat|Serping1|Ctso|Ctsl|Irf7|F3|Zfpm2|Lipa|Ctsb|Lamp2|Cr1l|Cfh|Pla2g4a|C2|Lyn|Csrp1|Pfn1|Anxa5|Notch4|Fdx1|Ppp2cb|Gnai3|Cpm|Ang|Jak2|Kcnip3|Adam9|Ppp4c|Lap3|Ctss|Prcp|Scg3|Fn1|Grb2|Mmp15|C1qc|Vcpip1|S100a13|Plek|Pdgfb|Irf1|Plaur|Rnf4|Clu|Mmp14|C1qa|Rabif|Prkcd|Casp3|Rhog|Mt3|Pik3ca|Psen1|Timp2|Cd55|Ctsd|Rbsn|Dusp6|Cdh13|Psmb9|Was|Casp9|Msrb1|Dusp5|Lta…
33	HALLMARK_APICAL_SURFACE	40	0.401843	0.0742115	0.0328182	Hspb1|Adipor2|Afap1l2|Slc2a4|Mal|Ephb4|Gstm5|Lyn|Adam10|Crybg1|Gas1|Rtn4rl1|App|B4galt1|Plaur|Shroom2|Thy1|Dcbld2|Sulf2|Efna5|Cx3cl1|Ghrl|Akap7|Ntng1|Flot2|Pcsk9|Tmem8b|Mdga1|Ncoa6|Brca1|Crocc|Atp8b1|Scube1
34	HALLMARK_PI3K_AKT_MTOR_SIGNALING	102	0.338569	0.0275735	0.0331056	Slc2a1|Tnfrsf1a|Calr|Sqstm1|Hsp90b1|Pik3r3|Actr3|Ptpn11|Cab39l|Prkag1|Pfn1|Nfkbib|Ppp1ca|Cdkn1b|Arf1|Actr2|Prkar2a|Sla|Ecsit|Rps6ka1|Nck1|Rac1|Prkaa2|Ddit3|Ube2d3|Akt1|Cdkn1a|Grb2|Eif4e|Nod1|Csnk2b|Vav3|Grk2|Arhgdia|Ywhab|Cdk2|Myd88|Rit1|Ralb|Tiam1|Dapp1|Cfl1|Ppp2r1b|Pin1|Ap2m1|Arpc3|Cxcr4|Smad2|Ube2n|Cab39|Irak4|Acaca|Fgf22|Pten|Rptor|Akt1s1|Hras|Map3k7|Ngf|Cltc|Ripk1|Traf2|Pak4|Tbk1|Itpr2|Adcy2…
35	HALLMARK_UNFOLDED_PROTEIN_RESPONSE	110	0.312035	0.0475285	0.0602173	Hspa5|Pdia6|Herpud1|Xbp1|Srprb|Calr|Dnajb9|Dnajc3|Hyou1|Sec11a|Spcs3|Psat1|Hsp90b1|Rps14|Eif4a3|Nfyb|Nfya|Slc7a5|Hspa9|Lsm4|Imp3|Tubb2a|Paip1|Tatdn2|Mtrex|Serp1|Atp6v0d1|Zbtb17|Shc1|H2ax|Ssr1|Srpr|Exosc9|Eif4e|Nhp2|Kif5b|Sec31a|Dnaja4|Npm1|Eef2|Eif4a1|Lsm1|Ero1a|Dkc1|Eif2s1|Gosr2|Eif4a2|Exosc4|Slc30a5|Ifit1bl1|Cks1b|Xpot|Spcs1|Cnot2|Fkbp14|Eif2ak3|Ywhaz|Atf3|Nop14|Pop4|Bag3|Cnot4|Banf1|Dctn1|Wipi…
36	HALLMARK_G2M_CHECKPOINT	195	-0.288195	0.0112108	0.0967032	Hmgb3|Kif4|Rad21|Bub3|Srsf10|Tmpo|Suv39h1|Odc1|Tra2b|Slc12a2|Stag1|Cbx1|Hspa8|Hira|Sfpq|Slc7a5|Dr1|Cdkn1b|Amd1|Hmga1|Hif1a|Rbm14|Mcm5|Stmn1|Prmt5|G3bp1|H2ax|Rps6ka5|Mt2|Ube2s|Cdc25a|Incenp|Ccnd1|Map3k20|Ncl|Cks2|Gspt1|Smc4|Prim2|Meis2|Snrpd1|Orc5|Cul3|Kif5b|Rad23b|Top1|Mcm6|Ctcf|Kif20b|Mcm3|Rpa2|Smarcc1|H2az1|Dkc1|Racgap1|H2az2|Ss18|Syncrip|Tacc3|Kpna2|Marcks|Cdc27|Kpnb1|Meis1|Cul1|Kmt5a|Slc38a1|…
37	HALLMARK_PANCREAS_BETA_CELLS	28	0.387413	0.161765	0.113642	Sst|Srprb|Sec11a|Pcsk1|Lmo2|Srp9|Mafb|Elp4|Pax6|Chga|Syt13|Nkx2-2|Spcs1|Pak3|Pcsk2|Stxbp1|Srp14|Foxo1|Dpp4|Akt3|Neurod1|Insm1|Abcc8|Dcx
38	HALLMARK_BILE_ACID_METABOLISM	94	0.299297	0.110909	0.125652	Retsat|Isoc1|Sod1|Prdx5|Bmp6|Hsd17b11|Idh2|Crot|Gstk1|Rbp1|Lonp2|Hsd17b4|Fads2|Pxmp2|Rxra|Aldh9a1|Abca9|Pecr|Scp2|Mlycd|Pnpla8|Gnmt|Nudt12|Npc1|Pex19|Acsl5|Cyp39a1|Slc35b2|Pex13|Pfkm|Abca4|Phyh|Pex26|Amacr|Acsl1|Bbox1|Cat|Abcd3|Gclm|Ttr|Abca5|Cyp27a1|Idh1|Nedd4|Optn|Pipox|Aqp9|Fads1|Pex11g|Cyp7b1|Slc27a2|Slc23a2|Abca1|Nr3c2|Abca6|Dhcr24|Ar|Bcar3|Ephx2|Lck|Sult2b1|Slc29a1|Atxn1|Pex7|Efhc1|Abca2|Cy…
39	HALLMARK_KRAS_SIGNALING_DN	143	-0.31306	0.0114155	0.129213	Dcc|Ryr2|Idua|Dlk2|Nos1|Nr6a1|Mthfr|Entpd7|Ypel1|Slc16a7|Sidt1|Kcnq2|Myh7|Ybx2|Abcg4|Epha5|Kcnd1|Mast3|Tfcp2l1|Zfp112|Col2a1|Slc25a23|Kmt2d|Ryr1|Chst2|Celsr2|Rgs11|Sptbn2|Nr4a2|Prodh|Skil|Egf|Plag1|Tgfb2|Adra2c|Mfsd6|Klk8|Nudt10|Mx2|Sstr4|Ptprj|Arpp21|Cd80|Grid2|P2rx6|Sphk2|Tenm2|Slc29a3|Brdt|Gtf3c5|Nrip2|Fggy|Dtnb|Gamt|Tshb|Kcnn1|Copz2|Synpo|Cdkal1|Btg2|Ntf3|Thrb|Tent5c|Htr1b|Zc2hc1c|Asb7|Kcne2|…
40	HALLMARK_PEROXISOME	92	0.290315	0.151184	0.165104	Retsat|Isoc1|Sod1|Prdx5|Hsd17b11|Pex14|Idh2|Gstk1|Crabp2|Abcb1a|Tspo|Lonp2|Hsd17b4|Aldh9a1|Cnbp|Fis1|Cln8|Prdx1|Scp2|Slc25a4|Msh2|Cadm1|Ctbp1|Pex11b|Mlycd|Ech1|Rdh11|Ywhah|Siah1a|Eci2|Vps4b|Sema3c|Pex2|Acsl5|Smarcc1|Bcl10|Ercc3|Slc25a17|Acox1|Slc35b2|Itgb1bp1|Hmgcl|Pex13|Nudt19|Elovl5|Ide|Acsl1|Cat|Abcd3|Slc25a19|Ehhadh|Sod2|Ttr|Hras|Dhrs3|Idh1|Mvp|Cdk7|Ctps|Acot8|Fads1|Pex5|Crat|Slc27a2|Slc23a2|…
41	HALLMARK_MYOGENESIS	184	0.261852	0.118794	0.168598	Apod|Tnnt2|Lsp1|Sparc|Nqo1|Gsn|Col6a2|Sphk1|Syngr2|Igfbp7|Itgb1|Prnp|Ptgis|Gpx3|Tpm2|Des|Sspn|Igfbp3|Hspb8|Col1a1|Ckb|Klf5|Pygm|Myh11|Aebp1|Cnn3|Bhlhe40|Sod3|Lama2|Tnnt1|Wwtr1|Fxyd1|Myo1c|Pkia|Tnni1|Efs|Foxo4|Col3a1|Cdkn1a|Atp6ap1|Pcx|Cryab|Tpd52l1|App|Pvalb|Igf1|Clu|Schip1|Ak1|Casq2|Sorbs1|Rit1|Tpm3|Scd2|Eif4a2|Mef2a|Mybpc3|Pfkm|Itgb4|Myh3|Svil|Cdh13|Ctf1|Mapk12|Eno3|Fabp3|Plxnb2|Acsl1|Pgam2|Lpi…
42	HALLMARK_ANDROGEN_RESPONSE	93	0.284452	0.168498	0.17368	Fkbp5|Dnajb9|Slc38a2|Stk39|Myl12a|Spcs3|Ndrg1|Sord|Ncoa4|Pa2g4|Hpgd|Tpd52|Gpd1l|Tmem50a|Pgm3|Sgk1|Ccnd3|Tsc22d1|Gnai3|Dbi|Adrm1|Pdlim5|Ell2|Maf|Akt1|Ccnd1|B2m|Plpp1|Vapa|B4galt1|Selenop|Bmpr1b|Lman1|Xrcc5|Ank|Gsr|Akap12|Scd2|Rab4a|Ube2j1|Ngly1|H1f0|Appbp2|Arid5b|Zmiz1|Slc26a2|Elovl5|Abcc4|Cdc14b|Itgav|Tnfaip8|Inpp4b|Aldh1a3|Acsl3|Srp19|Uap1|Scd1|Sms|Cenpn|Pias1|Ube2i|Adamts1|Map7|Fads1|Sat1|Iqgap…
43	HALLMARK_MITOTIC_SPINDLE	199	-0.264799	0.084788	0.199355	Akap13|Cdk5rap2|Kif22|Sorbs2|Shroom1|Nin|Kif23|Cntrl|Cep72|Brca2|Ssh2|Cntrob|Cep192|Hdac6|Kif11|Vcl|Cenpe|Dst|Trio|Kntc1|Myo9b|Dock4|Cdc42bpa|Cep131|Ophn1|Rasal2|Wasf1|Kif15|Flna|Arhgap4|Tubgcp3|Arhgef2|Apc|Rictor|Arap3|Tubgcp5|Uxt|Rapgef5|Myh10|Alms1|Cep250|Dync1h1|Stk38l|Pxn|Myh9|Kptn|Lrpprc|Ccdc88a|Lats1|Tubgcp2|Mark4|Tubd1|Cttn|Cd2ap|Sos1|Hook3|Plk1|Top2a|Kif3c|Clip1|Prex1|Rapgef6|Dock2|Nek2|…
44	HALLMARK_CHOLESTEROL_HOMEOSTASIS	71	0.279661	0.257752	0.253621	Ldlr|Mvd|Hsd17b7|Pcyt2|Lpl|Dhcr7|Stard4|Hmgcr|Acss2|Sqle|Idi1|Tm7sf2|Fdps|Sc5d|Atxn2|Pparg|Chka|Abca2|Errfi1|Tmem97|Trp53inp1|Cbs|Mal2|Mvk|Jag1|Srebf2|Hmgcs1|Cyp51|Atf5|Lss|Pdk3|Actg1|Stx5a|Fdft1|Cpeb2|Nsdhl|Scd1|Antxr2|Fasn|Alcam|Atf3|Ethe1|Cxcl16|Gldc|Acat3|Gusb|Scd2|Clu|Plaur|Nfil3|Gpx8|Gnai1|Gstm7|Pnrc1|Ech1|Fbxo6|Tnfrsf12a|Cd9|Fabp5|Anxa5|Fads2|Niban1|Ctnnb1|Pmvk|Aldoc|Sema3b|Ebp|Lgmn|Plscr1…
45	HALLMARK_WNT_BETA_CATENIN_SIGNALING	39	0.316159	0.33209	0.300826	Wnt6|Fzd1|Ctnnb1|Lef1|Hey1|Nkd1|Notch4|Tcf7|Wnt5b|Rbpj|Gnai1|Hey2|Axin2|Ppard|Cul1|Adam17|Hdac11|Ptch1|Hdac2|Notch1|Axin1|Hdac5|Fzd8|Wnt1|Myc|Csnk1e|Psen2|Ncstn|Jag1|Dll1|Ncor2|Ccnd2|Numb|Kat2a|Skp2|Jag2|Maml1|Trp53|Dvl2
46	HALLMARK_E2F_TARGETS	197	-0.228671	0.271028	0.437946	Hmgb3|Snrpb|Prdx4|Kif4|Rpa1|Lig1|Rad21|Tmpo|Suv39h1|Ppp1r8|Prps1|Rbbp7|Pold2|Ubr7|Pa2g4|Tra2b|Paics|Stag1|Pcna|Anp32e|Dclre1b|Tubb5|Ran|Msh2|Mcm7|Gins4|Cdkn1b|Asf1a|Eed|Usp1|Hmga1|Mcm5|Stmn1|Cse1l|Timeless|Nbn|Gins3|Pop7|Spc25|H2ax|Ube2s|Cdc25a|Slbp|Tubg1|Rnaseh2a|Dek|Cdkn1a|Cks2|Gspt1|Smc4|Prim2|Smc3|Smc6|Mcm6|Ctcf|Gins1|Mcm3|Brms1l|Rpa2|Cit|H2az1|Racgap1|Dck|Diaph3|Ssrp1|Pold3|Pole4|Eif2s1|Ipo7…
47	HALLMARK_DNA_REPAIR	148	0.223054	0.511797	0.490484	Bcam|Sf3a3|Tsg101|Zwint|Gtf2f1|Lig1|Gtf2b|Surf1|Dgcr8|Taf12|Vps28|Rnmt|Nudt9|Bcap31|Prim1|Eif1b|Arl6ip1|Sdcbp|Pcna|Alyref|Impdh2|Mrpl40|Gpx4|Tmed2|Tk2|Itpa|Umps|Hprt|Polr2c|Polr1c|Pde4b|Polr2f|Cmpk2|Adrm1|Nt5c3|Ercc8|Ddb1|Rbx1|Polr1h|Eloa|Hcls1|Nt5c|Rala|Ak3|Clp1|Polr2d|Polr2g|Gtf2h1|Rfc4|Vps37d|Gsdme|Tyms|Rpa2|Guk1|Ak1|Polr2h|Ercc3|Dctn4|Ssrp1|Pold3|Pole4|Taf10|Ada|Ercc4|Dad1|Edf1|Polr2i|Polh|Du…
48	HALLMARK_HEDGEHOG_SIGNALING	35	-0.275073	0.482906	0.540759	L1cam|Gli1|Vegfa|Ophn1|Unc5c|Crmp1|Cdk6|Nrcam|Myh9|Tle3|Nrp2|Dpysl2|Ache|Slit1|Cdk5r1|Vldlr|Rtn1|Nf1|Celsr1|Nrp1|Ldb1|Shh|Tle1|Ets2|Thy1|Pml|Rasa1|Amot|Ptch1|Hey2|Cntfr|Adgrg1|Hey1|Scg2
49	HALLMARK_SPERMATOGENESIS	102	-0.228217	0.493333	0.592128	Ace|Gpr182|Scg5|Pcsk4|She|Septin4|Pcsk1n|Art3|Gstm5|Slc12a2|Nefh|Jam3|Hspa2|Psmg1|Taldo1|Prkar2a|Grm8|Pias2|Vdac3|Arl4a|Gad1|Ddx25|Tsn|Pgs1|Scg3|Pebp1|Rfc4|Ip6k1|Zc3h14|Tle4|Hspa4l|Clpb|Coil|Phf7|Ncaph|Spata6|Ide|Lpin1|Adcyap1|Clvs1|Agfg1|Chrm4|Gmcl1|Ccna1|Mtor|Rad17|Zc2hc1c|Nphp1|Zpbp|Topbp1|Htr5a|Map7|Stam2|Pacrg|Ezh2|Ift88|Aurka|Mast2|Strbp|Oaz3|Nek2|Dbf4|Sirt1|Hspa1l|Csnk2a2|Parp2|Phkg2|Npy5r…
50	HALLMARK_MYC_TARGETS_V2	57	0.166531	0.9875	0.994232	Pprc1|Utp20|Rrp12|Ppan|Ipo4|Rrp9|Nop56|Mcm4|Tbrg4|Slc29a2|Tmem97|Nop2|Plk1|Exosc5|Gnl3|Mybbp1a|Bysl|Srm|Cdk4|Myc|Ndufaf4|Farsa|Nolc1|Hk2|Prmt3|Imp4|Ung|Tfb2m|Map3k6|Plk4|Nip7|Supv3l1|Mrto4|Ddx18|Dctpp1|Hspe1|Hspd1|Wdr43|Grwd1|Rabepk|Aimp2|Noc4l|Las1l|Tcof1|Npm1|Dusp2|Rcl1|Slc19a1|Mcm5|Nop16|Mphosph10|Cbx3|Pus1|Pes1|Wdr74|Phb|Pa2g4|Sord
