# Supplementary material for: Sex-specific resilience of neocortex to food restriction
Source: eLife. 2024 Jul 8;12:RP93052. doi: 10.7554/eLife.93052 (PMC11230624; doi:10.7554/eLife.93052)
Supplement: Supplementary file 2. — Same as Supplementary file 1 for females. We found that food restriction resulted in a significant alteration of 14 gene sets (at p-adj <0.05) in females; 13 of these were common to both sexes. n = 4 CTR female, n = 4 FR female mice. [file elife-93052-supp2.xlsx]

## Sheet: gsea_datafemhall
Supplementary File 2. Hallmark gene sets, Female food deprived vs control
	Name	gene.NO	stat	pvalue	padj	gene_names
1	HALLMARK_EPITHELIAL_MESENCHYMAL_TRANSITION	186	-0.42069	0	0.00448115	Vim|Scg2|Sparc|Mmp14|Dcn|Igfbp3|Jun|Pdlim4|Wnt5a|Tnc|Spp1|Matn2|Tnfaip3|Cd44|Mcm7|Ecm1|Eln|Serpinh1|Cald1|Sdc1|Fstl1|Grem1|Fuca1|Col4a1|Col5a3|Rhob|Myl9|Acta2|Col5a2|Plod2|Fbn1|Tgfbi|Nnmt|Emp3|Plod3|Nt5e|Vcam1|Lama1|Dab2|Fbn2|Tpm1|Gpc1|Sntb1|Anpep|Vegfc|Oxtr|Fermt2|Col4a2|Dpysl3|Ccn2|Tgm2|Bdnf|Col3a1|Calu|Itgb1|Notch2|Itgb5|Fmod|Loxl1|Tgfbr3|Fgf2|Id2|Thbs1|Pdgfrb|Cadm1|Gja1|Cdh2|Serpine2|Efemp2|F…
2	HALLMARK_CHOLESTEROL_HOMEOSTASIS	71	0.470971	0.00221239	0.00538169	Mvd|Stard4|Atf5|Hmgcs1|Idi1|Nsdhl|Sqle|Ldlr|Tmem97|Sc5d|Fdft1|Cyp51|Hmgcr|Srebf2|Tnfrsf12a|Fdps|Atxn2|Nfil3|Abca2|Scd2|Mvk|Cd9|Pparg|Fasn|Cxcl16|Niban1|Pcyt2|Gldc|Plaur|Dhcr7|Hsd17b7|Actg1|Scd1|Pdk3|Sema3b|Lss|Cpeb2|Tm7sf2|Acss2|Alcam|Mal2|Atf3|Ebp|Anxa5|Chka|Clu|Lpl|Gnai1|Fabp5|Trp53inp1|Fbxo6|Antxr2|Gpx8|Pmvk|Gstm7|Plscr1|Aldoc|Stx5a|Gusb|Fads2|Lgmn|Acat3|Jag1|Errfi1|Ctnnb1|Pnrc1|Cbs|Ech1|S100a…
3	HALLMARK_NOTCH_SIGNALING	32	-0.573668	0	0.00672173	Lfng|Fzd1|Heyl|Hes1|Wnt5a|Ccnd1|Fzd7|Notch3|Sap30|Psenen|Psen2|Jag1|Tcf7l2|Maml2|Dtx4|Dll1|Cul1|Notch2|Rbx1|Fbxw11|Notch1|Kat2a|Fzd5|Aph1a|Wnt2|Dtx1|St3gal6|Prkca|Skp1|Dtx2|Arrb1|Ppard
4	HALLMARK_ANGIOGENESIS	32	-0.529495	0.00763359	0.010694	Fgfr1|Spp1|Vtn|Pglyrp1|Nrp1|Fstl1|Col5a2|Thbd|Slco2a1|Pf4|Jag1|Kcnj8|Lrpap1|Stc1|Col3a1|Vav2|Ptk2|Msx1|Lum|Postn|Tnfrsf21|App|Lpl|Vegfa|Pdgfa|Jag2|Itgav|Vcan|Ccnd2
5	HALLMARK_IL6_JAK_STAT3_SIGNALING	72	-0.443055	0.00525394	0.0109159	Jun|Cd44|Tnfrsf1a|Il10rb|Tnfrsf1b|Irf1|Pdgfc|Ifngr2|Stat3|Ltbr|Pf4|Hmox1|Cd14|Osmr|Il13ra1|Hax1|Il1r1|Ifngr1|Stam2|Stat1|Csf1|Cd36|Il17rb|Socs1|Lepr|Acvrl1|Csf2rb2|Grb2|Il6st|Cd38|Map3k8|Tgfb1|Tlr2|Il3ra|Ptpn11|Ifnar1|Ptpn2|Tnfrsf21|Myd88|Il12rb1|Itga4|Ptpn1|Tyk2|Il4ra|A2m|Pim1|Irf9|Stat2|Bak1|Socs3|Crlf2|Cntfr|Il15ra|Acvr1b|Fas|Itgb3|Cd9|Csf2ra|Cbl|Csf3r|Tnfrsf12a|Pik3r5|Il17ra
6	HALLMARK_COAGULATION	104	-0.431088	0.00176991	0.0117258	Sparc|Mmp14|Lefty2|Serping1|Anxa1|Hmgcs2|Plat|Maff|Lta4h|C2|Gp1ba|Rabif|Thbd|Fbn1|Arf4|Pf4|Iscu|Pecam1|Msrb2|Lgmn|Plau|Adam9|Tmprss6|Rac1|Thbs1|Klk8|Ctsh|Casp9|Furin|Mmp9|Ctsl|Mmp15|Pef1|Wdr1|Sh2b2|Lamp2|Ctsb|Mmp2|Vwf|Htra1|Mmp11|F3|Gsn|Pros1|Timp3|Bmp1|Crip2|S100a13|Prep|Fyn|Cfh|Gnb2|A2m|P2ry1|Clu|F2rl2|Gng12|Rapgef3|Ang|Ctso|Usp11|Plek|Csrp1|Gda|Prss23|Sirt2|Capn5|Proz|F8|Capn2|C8g|C1qa|C1s1|It…
7	HALLMARK_HYPOXIA	186	-0.390341	0	0.0119377	Anxa2|Dcn|Igfbp3|Ddit4|Ackr3|Jun|Cited2|Cavin1|Tes|Tnfaip3|Angptl4|Gpc3|Ccng2|Ier3|Gpc4|Btg1|Efna1|Pgm1|Sap30|Pnrc1|Maff|Klf6|Slc6a6|Zfp36|Gpi1|Cp|Gck|Aldoa|Ampd3|Pam|Tpst2|Glrx|Cdkn1c|Sdc2|Tgfbi|Eno3|Slc2a1|Slc2a3|Adm|Hspa5|Hmox1|Ero1a|Cdkn1b|Tmem45a|Tpi1|Hk2|Ndrg1|Errfi1|Gpc1|Grhpr|Cavin3|Stc1|Dpysl4|Ccn2|Tgm2|Akap12|Gapdh|Eno1|Map3k1|Pgf|Scarb1|Cav1|Gaa|Ppp1r15a|Pfkfb3|Tpd52|Bcl2|Prdx5|Tgfb3|A…
8	HALLMARK_INTERFERON_ALPHA_RESPONSE	90	-0.462002	0	0.0134435	Psme1|Samd9l|Ifitm2|Tap1|Ube2l6|Eif2ak2|Gbp2|Tent5a|Txnip|Usp18|Trim21|Irf1|Irf7|Ifitm3|Nmi|Parp9|Ifit3|Mvb12a|Ifi30|Rsad2|Pnpt1|Ncoa7|Oas1a|Ifit2|Psme2|Slc25a28|Gmpr|Tdrd7|Csf1|Rtp4|Psmb8|Cmpk2|Trim5|Ifih1|Cd74|Isg15|Lgals3bp|Epsti1|Trim26|Plscr1|Mx2|Trim25|Ddx60|Irf2|Ogfr|Parp14|Mov10|Casp1|Nub1|Casp8|Parp12|Ifi35|Trafd1|Cd47|Rnf31|Bst2|Lpar6|Il4ra|Ccrl2|Ifitm1|B2m|Trim12c|Irf9|Tmem140|Stat2|La…
9	HALLMARK_INTERFERON_GAMMA_RESPONSE	175	-0.382852	0	0.013805	Psme1|Serping1|Samd9l|Ifitm2|Tap1|Gbp9|Tapbp|Ube2l6|Lats2|Eif2ak2|Tnfaip3|Txnip|Isoc1|Btg1|St8sia4|Pla2g4a|Usp18|Nfkbia|Trim21|Irf1|Irf7|Ifitm3|Nmi|Ifit3|Upp1|Stat3|H2-D1|Ifi30|Rsad2|Irf8|Pnpt1|Nampt|Bpgm|Ifit2|Eif4e3|Psme2|Vcam1|Slc25a28|Lysmd2|Psmb10|Ripk1|Samhd1|Rapgef6|Ifnar2|Ptpn6|Stat1|Tdrd7|Rtp4|Cd274|Psmb8|Cmpk2|Socs1|Icam1|Jak2|Fgl2|Csf2rb2|Ifih1|Cd74|Isg15|H2-Eb1|Lgals3bp|Arl4a|Epsti1|T…
10	HALLMARK_KRAS_SIGNALING_UP	183	-0.361913	0	0.0209874	F13a1|Apod|Igfbp3|Spp1|Tmem100|Serpina3n|Plat|Tnfaip3|Angptl4|Emp1|Spon1|Prkg2|Aldh1a2|Gpnmb|Nrp1|Tnfrsf1b|Vwa5a|Cidea|Klf4|Mycn|Nap1l2|Fuca1|Fbxo4|Etv4|Glrx|Cpe|Tnnt2|Sdccag8|Irf8|Hsd11b1|Lcp1|Tfpi|Mpzl2|Pcsk1n|Bpgm|Ero1a|Bmp2|Avl9|Sparcl1|Btbd3|Ngf|Trib2|Wnt7a|Ptbp2|Pecam1|Plvap|Scg5|Plau|Psmb8|Tspan13|Akap12|Map3k1|Ptcd2|Spry2|Id2|Mmp9|Lif|Eng|Ppp1r15a|Scn1b|Cbr4|Ano1|Ptprr|Flt4|St6gal1|Gprc5b…
11	HALLMARK_ALLOGRAFT_REJECTION	152	-0.370237	0	0.0233193	H2-T23|Tgfb2|Tap1|Igsf6|Tapbp|Krt1|Gbp2|Tap2|Lyn|St8sia4|C2|F2r|Ifngr2|Irf7|Ly75|Irf8|Inhbb|Pf4|Ccnd3|Abi1|Was|Il12a|Acvr2a|Psmb10|Ccr5|Hcls1|Rpl39|Akt1|Ifngr1|Ifnar2|Ptpn6|Cd80|Eif3d|Nos2|Rps19|Il16|Stat1|Csf1|Degs1|Socs1|Icam1|Jak2|Apbb1|Spi1|Rars|Mmp9|Lif|Cd74|Tpd52|Rpl9|Capg|Tlr3|Dars|Eif3j2|Csk|Rps9|Tgfb1|Itgb2|Tlr2|Icosl|Dyrk3|Lck|H2-Aa|Prkcg|Eif3j1|Hif1a|Nck1|Abce1|H2-DMb1|Egfr|Npm1|Elf4|M…
12	HALLMARK_INFLAMMATORY_RESPONSE	157	-0.361449	0.00664452	0.0243725	Mmp14|Tapbp|Ccl17|Eif2ak2|Gpc3|Lyn|Tacr3|Tnfrsf1b|Klf6|Nfkbia|Irf1|Edn1|Ifngr2|Gp1ba|Irf7|Nmi|Aqp9|Emp3|Adgre1|Adm|Nampt|Btg2|Cd14|Osmr|Abi1|Acvr2a|Il1r1|Slc7a2|Abca1|Myc|Csf1|Rtp4|Psen1|Icam1|Clec5a|Tacr1|Lif|Scn1b|Sphk1|Tlr3|Itga5|Adrm1|Vip|Oprk1|Nfkb1|Ahr|Pdpn|Cmklr1|Hbegf|Met|Tlr2|Ptpre|C3ar1|Icosl|Tpbg|Lck|Rgs16|Kif1b|Slc31a2|Hif1a|Hrh1|Atp2c1|Tnfsf10|F3|Ndp|P2rx4|Ifnar1|Kcnmb2|Gna15|Nlrp3|S…
13	HALLMARK_TNFA_SIGNALING_VIA_NFKB	179	-0.346648	0.00169491	0.0391747	Trip10|Cebpd|Ackr3|Jun|Hes1|Tap1|Tnc|Ccnd1|Klf2|Tnfaip3|Cd44|Bcl6|Ier3|Dusp4|Snn|Btg1|Efna1|Pnrc1|Ehd1|Maff|Klf6|Klf4|Cebpb|Zfp36|Nfkbia|Irf1|Stat5a|Edn1|Rhob|Ifngr2|B4galt5|Plk2|Dnajb4|Sqstm1|Slc2a3|Nampt|Tubb2a|Btg2|Marcks|Ifit2|Bmp2|Tnip2|Rcan1|Jag1|Phlda1|Sgk1|Tnfaip8|Nfe2l2|Ets2|Eif1|Pdlim5|Clcf1|Cd80|Abca1|Myc|Plau|Csf1|Icam1|Nfkb2|Nfkbie|Cflar|Panx1|Id2|Cd83|Dram1|Ifih1|Lif|Relb|Tsc22d1|Pp…
14	HALLMARK_APOPTOSIS	150	-0.34083	0.0189329	0.0497138	Hspb1|Dcn|Anxa1|Dpyd|Jun|Tgfb2|Tap1|Ccnd1|Plat|Cd44|Emp1|Txnip|Timp2|Ier3|Lef1|Rnasel|Irf1|F2r|Rhob|Ctnnb1|Ifitm3|Bcl2l1|Sod1|Rhot2|Dap3|Sqstm1|Gucy2e|Btg2|Gpx3|Hmox1|Bmp2|Cd14|Pdcd4|Cdkn1b|Psen2|Gstm2|Gsr|Nedd9|Dap|Ifngr1|Fez1|Psen1|Dnaja1|Ppt1|Cflar|Tgfbr3|Pdgfrb|Casp9|Pea15a|Cav1|Tspo|Ptk2|Xiap|Plppr4|Wee1|Casp2|Eno2|Sat1|Cth|Cd38|Ccna1|Gpx4|Cyld|Bnip3l|Add1|Mmp2|Casp7|Vdac2|Dnajc3|Bcl2l11|Dff…
15	HALLMARK_HEDGEHOG_SIGNALING	35	-0.438321	0.0705244	0.0500308	Adgrg1|Scg2|Gli1|Nrp1|Nrp2|Rasa1|Ptch1|Ets2|Tle1|Amot|Slit1|Unc5c|Hey2|Ophn1|Pml|Crmp1|Rtn1|Hey1|Shh|Vegfa|Nf1|Thy1|Ldb1|Ache|Cdk6|Tle3|Vldlr|Cdk5r1|Dpysl2|Cntfr|L1cam|Nrcam|Myh9|Celsr1
16	HALLMARK_XENOBIOTIC_METABOLISM	161	-0.33936	0.0102389	0.0502126	Ptgds|Asl|Tgfb2|Pink1|Slc6a12|Cyp4f15|Vtn|Apoe|Kars|Man1a|Pgd|Ech1|Gart|Tnfrsf1a|Smox|Gss|Nqo1|Cdo1|Slc6a6|Tdo2|Gstt2|Aqp9|Upp1|Dcxr|Aox1|Spint2|Adh5|Igf1|Irf8|Hsd11b1|Ssr3|Hmox1|Alas1|Ahcy|Fmo1|Mpp2|Ptgr1|Gsr|Psmb10|Dhps|Ets2|Maoa|Ptges3|Il1r1|Fah|Pdlim5|Gclc|Slc12a4|Gsto1|Slc46a3|Cbr1|Nmt1|Entpd5|Ccl25|Cd36|Gad1|Pmm1|Lonp1|Cyp2j9|Id2|Pgrmc1|Arg2|Acox3|Gstm4|Esr1|Pemt|Por|Cndp2|Tmem176b|Shmt2|He…
17	HALLMARK_DNA_REPAIR	148	-0.34138	0.0123457	0.0519747	Lig1|Eif1b|Umps|Tsg101|Aaas|Impdh2|Dgcr8|Rpa2|Tyms|Zwint|Gtf2f1|Ercc3|Fen1|Rad51|Gsdme|Ssrp1|Pola2|Cstf3|Pcna|Polr1c|Pola1|Polr2f|Clp1|Gtf2b|Upf3b|Sdcbp|Nudt9|Rae1|Pold1|Bcam|Taf12|Polr2h|Rrm2b|Pold3|Nt5c|Hcls1|Vps28|Smad5|Surf1|Sf3a3|Dguok|Nelfb|Cmpk2|Trp53|Pold4|Nelfcd|Polr2j|Eloa|Gtf3c5|Poll|Aprt|Ak1|Polr2k|Nudt21|Rfc3|Supt5|Rad52|Sac3d1|Alyref|Rnmt|Dctn4|Ddb2|Rbx1|Itpa|Brf2|Adrm1|Arl6ip1|Bola…
18	HALLMARK_KRAS_SIGNALING_DN	144	-0.344671	0.011925	0.0535831	Myh7|Gamt|Chst2|Tfcp2l1|Kcnd1|Nr6a1|Fggy|Sptbn2|Dlk2|Dcc|Kmt2d|Arpp21|Ryr1|Slc25a23|Ryr2|Cyp39a1|Grid2|Sox10|Gpr3|Skil|Slc16a7|Mthfr|Rgs11|Efhd1|Selenop|Igfbp2|Kcnq2|Kcnn1|Tenm2|Idua|Celsr2|P2rx6|Slc38a3|Prodh|Mfsd6|Tshb|Cntfr|Sidt1|Nphs1|Synpo|Clstn3|Copz2|Ybx2|Zfp112|Abcg4|Nr4a2|Slc30a3|Thrb|Mast3|Cpeb3|Slc29a3|Tent5c|Magix|Col2a1|Ypel1|Entpd7|Fgf22|Egf|Arhgdig|Adra2c|Kcne2|Zbtb16|Ptprj|Dtnb|Ma…
19	HALLMARK_GLYCOLYSIS	188	-0.315	0.0165837	0.0711239	Dcn|Igfbp3|Ddit4|Cited2|Chst12|Cd44|Angptl4|Gpc3|Fkbp4|Ier3|Gpc4|Sdc1|Sap30|Bpnt1|Chst1|Aldoa|Pgls|Pam|Egln3|Galk2|Glrx|Cln6|Gmppa|Sod1|Sdc2|Plod2|Mdh2|Tgfbi|Cacna1h|Taldo1|Hspa5|Ero1a|Nt5e|Aurka|Ecd|Il13ra1|Tpi1|Hk2|Gnpda1|G6pdx|Hs6st2|Ndufv3|Hax1|Gpc1|Srd5a3|Pkp2|Ppp2cb|Psmc4|B4galt4|Gclc|Akr1a1|Pkm|Stc1|Dpysl4|Copb2|Pmm2|Pygb|Lct|Dld|Lhx9|Gusb|Eno1|Xylt2|Rars|Slc25a10|Ext2|Prps1|Phka2|Aldoa|Gl…
20	HALLMARK_UV_RESPONSE_UP	150	-0.326672	0.0241796	0.0729432	Mmp14|Tap1|Ret|Sult1a1|Slc6a12|Hspa2|Fkbp4|Stip1|Lyn|Tacr3|Btg1|Ddx21|Cdo1|Fen1|Nfkbia|Hyal2|Irf1|Aldoa|Rhob|Cdc5l|Arrb2|Ppp1r2|Cdkn1c|Sqstm1|Ap2s1|Btg2|Gpx3|Hmox1|Ccnd3|Bmp2|Alas1|Pole3|Fmo1|Lhx2|Polr2h|Bsg|Ppif|Rpn1|Maoa|Mapk8ip2|Polg2|Urod|Chrna5|Icam1|Creg1|Grina|Psmc3|Dnaja1|Ppt1|Tars|Rab27a|Rxrb|Furin|Klhdc3|Prpf3|Ctsl|H2-Q2|Parp2|Il6st|Prkcd|Ykt6|Aldoa|Eif2s3x|Nptx2|Kcnh2|Eno2|Mrpl23|Ppat|…
21	HALLMARK_APICAL_SURFACE	40	-0.39412	0.0860215	0.0978233	Atp8b1|Mal|Scube1|Akap7|Efna5|Brca1|Ghrl|Ncoa6|Pcsk9|Crocc|Plaur|Flot2|Sulf2|Dcbld2|Shroom2|Cx3cl1|Tmem8b|Thy1|App|Gstm5|Adam10|Gas1|B4galt1|Ntng1|Crybg1|Rtn4rl1|Adipor2|Mdga1|Slc2a4|Lyn|Ephb4|Afap1l2|Hspb1
22	HALLMARK_PANCREAS_BETA_CELLS	29	-0.411818	0.149901	0.139906	Sst|Gck|Srprb|Nkx2-2|Elp4|Neurod1|Pax6|Syt13|Srp9|Spcs1|Akt3|Pak3|Lmo2|Sec11a|Mafb|Pcsk1|Dcx|Stxbp1|Srp14|Chga|Foxo1|Pcsk2|Insm1|Dpp4|Abcc8
23	HALLMARK_COMPLEMENT	164	-0.292287	0.0868794	0.189972	Mmp14|Serping1|Plat|Tnfaip3|Gnai2|Lyn|Timp2|Pfn1|Pla2g4a|Ehd1|Maff|Ppp4c|Cebpb|Cr1l|Irf1|Cp|Lta4h|C2|Gp1ba|Irf7|Cdh13|Rabif|Ctsc|Dgkg|Rce1|Hspa5|Was|Prcp|Zfpm2|Ppp2cb|Lgmn|Col4a2|Cd36|Psen1|Adam9|Tmprss6|Src|Jak2|Ctsh|Casp9|Pik3cg|Cblb|Grb2|Mt3|Ctsl|Dock4|Prkcd|Lipa|Mmp15|Usp14|Sirt6|Plscr1|L3mbtl4|Rnf4|Lamp2|Ctsb|Irf2|Notch4|Lck|Usp8|Fcer1g|Prss36|Casp7|Kif2a|Hspa1a|Me1|Casp3|C1qc|Sh2b3|F3|Casp1…
24	HALLMARK_MYC_TARGETS_V1	200	-0.277357	0.12437	0.234802	Mcm5|U2af1|Impdh2|Cct3|Mcm7|Pold2|Kars|Tyms|Srsf2|Ddx21|Psmb3|C1qbp|Cct5|Sf3a1|Ncbp1|Mcm6|Cdc45|Rrm1|Cdc20|Dhx15|Rnps1|Eif4a1|Hsp90ab1|Lsm2|Cct4|Pcna|Usp1|Cct7|Psmd8|Snrpg|Snrpd3|Pa2g4|Uba2|Snrpa|Dek|Pole3|Ilf2|Gspt1|Tcp1|Bub3|Rpl18|Psmc4|Snrpd2|Psmd1|Ptges3|Cul1|Rsl1d1|Rplp0|Eif3d|Myc|Cbx3|Srsf1|Tomm70a|Cct2|Rps5|G3bp1|Ssb|Pcbp1|Trim28|Hdac2|Eif3b|Vdac3|Ruvbl2|Psmd7|Psmd3|Rpl14|Ddx18|Xpot|Lsm7|S…
25	HALLMARK_E2F_TARGETS	197	-0.264463	0.169463	0.314878	Lig1|Mcm5|Hmgb3|Prim2|Snrpb|Racgap1|Rpa2|Mcm7|Pold2|Pop7|Brms1l|Srsf2|Rpa1|Suv39h1|Stag1|Ssrp1|Tubg1|Mcm6|Exosc8|Cdc20|Ube2s|Pola2|Dclre1b|Hmga1|Dctpp1|Cdc25a|Pcna|Usp1|Nbn|Rbbp7|Rad51c|Slbp|Pa2g4|Aurka|Dek|Msh2|Cdkn1b|Smc6|Tacc3|Nup107|Gspt1|Diaph3|Jpt1|Pold1|Pole|Tmpo|Pold3|Rnaseh2a|Ezh2|Lbr|Rad51ap1|Myc|Srsf1|Cks1b|Trp53|Ilf3|Espl1|Gins3|Rad1|Trip13|Psmc3ip|Pan2|Ppp1r8|Timeless|Paics|Nudt21|Rf…
26	HALLMARK_IL2_STAT5_SIGNALING	183	-0.257892	0.223752	0.37376	Lrig1|Umps|Spp1|Dcps|Cd44|Emp1|Ecm1|Anxa4|Ptrh2|Nrp1|Tnfrsf1b|Maff|Klf6|Prnp|Rhob|Etv4|Ifitm3|Bcl2l1|Cdkn1c|Eno3|Irf8|Slc2a3|Mapkapk2|Etfbkmt|Dhrs3|Rnh1|Syngr2|Myo1c|Pdcd2l|Nt5e|Ccnd3|Bmp2|Twsg1|Galm|Ahcy|Hk2|Ndrg1|Ptch1|Amacr|Phlda1|Snx14|Slc39a8|Cd81|Ifngr1|Fah|Gsto1|Tiam1|Nfkbiz|Myc|Csf1|Tgm2|Socs1|Ncs1|Cd83|Pus1|Fgl2|Furin|Lif|Bcl2|Arl4a|Itih5|Capg|Batf3|Prkch|Nop2|Ahr|Plscr1|Pth1r|Irf6|Map3k…
27	HALLMARK_ESTROGEN_RESPONSE_EARLY	180	-0.256565	0.240464	0.393441	Lrig1|Cyp26b1|Hes1|Ret|Ccnd1|Calb2|Cd44|Fkbp4|Sec14l2|Podxl|Foxc1|Klf4|Mybl1|Slc39a6|Lad1|Gla|Slc24a3|Nbl1|Slc16a1|Pex11a|Nadsyn1|Rps6ka2|Slc2a1|Hspb8|Dhrs3|Inhbb|Tmem164|Sh3bp5|Mreg|Thsd4|Scnn1a|Tob1|Rhod|Npy1r|Ppif|Unc119|Slc1a4|Wfs1|Fkbp5|Slc7a2|Tiam1|Myc|Amfr|Tgm2|Sybu|Il17rb|Slc27a2|Nxt1|Jak2|Isg20l2|Add3|Mindy1|Gja1|Kcnk5|Scarb1|Ttc39a|Mill2|Bcl2|Il6st|Tsku|Slc9a3r1|Cxcl12|B4galt1|Slc1a1|Pg…
28	HALLMARK_P53_PATHWAY	194	-0.249966	0.254934	0.39416	Slc7a11|Prmt2|Ddit4|Jun|Tap1|Hexim1|Apaf1|Txnip|Ier3|Sdc1|Btg1|Vwa5a|Ptpn14|Klf4|Blcap|Ankra2|Fuca1|Coq8a|F2r|Rad9a|Cdh13|Plk2|Upp1|Dcxr|Ifi30|Pcna|Perp|Inhbb|Rad51c|Btg2|Hmox1|Ccnd3|Bmp2|Sesn1|Ei24|Rpl36|Ndrg1|Tob1|Ctsf|Baiap2|Iscu|Rpl18|Cd81|Rchy1|Slc3a2|Ip6k2|Rab40c|Traf4|Socs1|Wrap73|Trp53|Pmm1|Klk8|Hint1|Ak1|Plxnb2|Tm7sf3|Dram1|Lif|Tsc22d1|Ppp1r15a|Rap2b|Ddb2|Sphk1|Tspyl2|Irak1|Tax1bp3|Rxra|…
29	HALLMARK_MYOGENESIS	185	-0.236369	0.425987	0.563082	Tnnc1|Myl4|Myh7|Vipr1|Tnni1|Akt2|Acta1|Gnao1|Erbb3|Sspn|Ephb3|Pvalb|Ryr1|Tcap|Cox6a2|Kcnh1|Myl6b|Speg|Myh9|Mef2c|Dmpk|Nav2|Agl|Sod3|Fdps|Slc6a8|Mybpc3|Scd2|Fst|Actn2|Ptp4a3|Itgb4|Dapk2|Igfbp7|Dmd|Bag1|Ncam1|Lama2|Ifrd1|Agrn|Myh1|Dtna|Cryab|Stc2|Tsc2|Fxyd1|Scd1|Rb1|Ppp1r3c|Myh3|Myom1|Sirt2|Sptan1|Reep1|Mylk|Pygm|Ctf1|Ablim1|Chrnb1|Ache|Gabarapl2|Mylpf|Kifc3|Pgam2|Col15a1|Cox7a1|Bin1|Ocel1|Ppfia4|D…
30	HALLMARK_BILE_ACID_METABOLISM	93	0.294787	0.202381	0.579462	Idi1|Dio2|Tfcp2l1|Ephx2|Fads1|Abcd2|Cyp39a1|Atxn1|Pex6|Rbp1|Pex11g|Aldh1a7|Abca3|Cyp27a1|Abca2|Sult2b1|Pex7|Slc23a2|Abca6|Pex16|Phyh|Dhcr24|Pipox|Gstk1|Lipe|Cyp46a1|Pex26|Pex13|Bcar3|Crot|Fdxr|Aldh9a1|Abca4|Abcg4|Pecr|Slc35b2|Retsat|Cat|Rxrg|Gnpat|Scp2|Pxmp2|Ar|Pfkm|Pnpla8|Acsl1|Idh1|Ttr|Gnmt|Abcd1|Pex12|Abca5|Npc1|Pex19|Efhc1|Lck|Acsl5|Hsd17b11|Bbox1|Pex1|Abcd3|Bmp6|Rxra|Paox|Hsd17b4|Abca8b|Optn…
31	HALLMARK_ESTROGEN_RESPONSE_LATE	176	-0.235676	0.454844	0.591647	Cyp26b1|Ret|Ccnd1|Cyp4f15|Hmgcs2|Serpina3n|Cd44|Fkbp4|Dnajc12|Ass1|Foxc1|Chst8|Klf4|Zfp36|Fgfr3|Dlg5|Cdc20|Cpe|Gla|Slc24a3|Nbl1|Slc16a1|Dcxr|Rps6ka2|Hspb8|Dnajc1|Perp|Pdcd4|Scnn1a|Ascl1|Tob1|Npy1r|Sgk1|Lsr|Ppif|Slc1a4|Wfs1|Rnaseh2a|Fkbp5|Ptpn6|Tiam1|Igsf1|Snx10|Amfr|Idh2|Il17rb|Tspan13|Aldh3a2|Slc27a2|Nxt1|Jak2|Gper1|Id2|Ckb|Slc29a1|Add3|Kcnk5|Scarb1|Cav1|Mill2|Bcl2|Il6st|Slc9a3r1|Cxcl12|Mettl3|P…
32	HALLMARK_ADIPOGENESIS	195	-0.223623	0.547297	0.681946	Nabp1|Angpt1|Cavin1|Sult1a1|Angptl4|Apoe|Ccng2|Bcl6|Ech1|Atp1b3|Cavin2|Pgm1|Sncg|Cidea|Sowahc|Aldoa|Stat5a|Col4a1|Ucp2|Uqcrc1|Ubc|Ndufs3|Sod1|Omd|Mdh2|Hspb8|Taldo1|Gpx3|Gphn|Sparcl1|Pdcd4|Adipor2|Tob1|Dlat|Immt|Cmbl|Ifngr1|Fah|Esrra|Suclg1|Abca1|Cpt2|Nmt1|Cd36|Dld|Itga7|Sdhb|Samm50|Acadm|Sqor|Slc19a1|Cox8a|Gpam|Slc5a6|Gpat4|Idh3a|Tkt|Dnajb9|Acads|Rab34|Scarb1|Elmod3|Slc25a10|Pfkfb3|Ndufa5|Araf|Ar…
33	HALLMARK_MITOTIC_SPINDLE	199	0.241146	0.266497	0.828742	Apc|Kptn|Mid1|Dst|Shroom1|Sorbs2|Dync1h1|Cdc42bpa|Myh10|Cdk5rap2|Myh9|Top2a|Mid1ip1|Epb41l2|Hook3|Arhgef2|Alms1|Map3k11|Kif22|Tuba4a|Lrpprc|Sptbn1|Plk1|Kif5b|Kif23|Brca2|Rasal2|Itsn1|Nin|Myo9b|Arap3|Stk38l|Kif11|Dynll2|Ezr|Synpo|Cenpf|Kif3c|Abl1|Fscn1|Hdac6|Arhgef12|Ssh2|Trio|Sptan1|Cenpe|Rhof|Shroom2|Actn4|Vcl|Pcgf5|Dlg1|Prc1|Flna|Ckap5|Epb41|Fbxo5|Bcar1|Cntrob|Prex1|Ccdc88a|Kntc1|Clasp1|Kif15|C…
34	HALLMARK_UNFOLDED_PROTEIN_RESPONSE	110	-0.225329	0.657487	0.838689	Nabp1|Nfya|Ddit4|Nop14|Cebpb|Srpr|Dkc1|Eif4a1|Srprb|Fkbp14|Eif4a3|Imp3|Mtrex|Tubb2a|Shc1|Hspa5|Ero1a|Slc1a4|Wfs1|Pdia6|Nfyb|Dnaja4|Exosc2|Sec31a|Hsp90b1|Cks1b|Cnot2|Zbtb17|Tars|Cnot4|Calr|Exosc4|Paip1|Exosc10|Dnajb9|Xpot|Hspa9|Banf1|Tspyl2|Gosr2|Ttc37|Atp6v0d1|Rps14|Herpud1|Hyou1|Preb|Lsm1|Ywhaz|Cxxc1|Exoc2|Exosc5|Dnajc3|Npm1|Eif4a2|Spcs1|Slc30a5|Dcp1a|Khsrp|Dctn1|Bag3|Nolc1|H2ax|Tatdn2|Eif4ebp1|…
35	HALLMARK_PEROXISOME	92	0.293136	0.142145	0.845108	Idi1|Acaa1a|Cacna1b|Ephx2|Fads1|Abcd2|Abcc8|Abcb9|Atxn1|Pex6|Dlg4|Aldh1a7|Top2a|Fdps|Sult2b1|Slc23a2|Elovl5|Ctps|Pabpc1|Ide|Hras|Dhcr24|Gstk1|Bcl10|Acox1|Abcc5|Pex13|Sod2|Cnbp|Aldh9a1|Rdh11|Acot8|Slc35b2|Retsat|Cat|Rxrg|Gnpat|Scp2|Prdx1|Siah1a|Slc25a19|Slc25a4|Acsl1|Idh1|Ttr|Cln8|Cdk7|Abcd1|Nudt19|Ywhah|Crat|Pex2|Ercc1|Mvp|Vps4b|Acsl4|Itgb1bp1|Abcb1a|Sema3c|Acsl5|Pex14|Hmgcl|Hsd17b11|Fis1|Abcd3|P…
36	HALLMARK_G2M_CHECKPOINT	195	0.204337	0.710588	0.876473	Mcm5|Hmgb3|Prim2|Sfpq|Ccnd1|Racgap1|Rpa2|Rbm14|Srsf2|Srsf10|Prmt5|Sap30|Rbl1|Cdc7|Suv39h1|Stag1|Mcm6|Cdc45|Cdc20|Dkc1|Ube2s|Pola2|Ccnf|Dr1|Hmga1|Cdc25a|Smc2|Hira|Meis1|Marcks|Aurka|Cdkn1b|Tacc3|Gspt1|Jpt1|Bub3|Fancc|Ss18|Pole|Tmpo|Orc5|Ezh2|Lbr|Tpx2|Cul1|Rps6ka5|Nusap1|Myc|Srsf1|Cks1b|G3bp1|Hspa8|Nup50|Notch2|Nek2|Ilf3|Espl1|Prpf4b|Incenp|Casp8ap2|Cul3|Kif4|Cbx1|Map3k20|Smarcc1|Traip|Kmt5a|Mcm2|U…
37	HALLMARK_FATTY_ACID_METABOLISM	143	0.204978	0.752427	0.880848	Psme1|Acot2|Ube2l6|Hmgcs2|Ech1|Cbr3|Mlycd|Cidea|Aldoa|Tdo2|Mdh2|Eno3|Nbn|Adipor2|Erp29|Fmo1|Adsl|Nthl1|Acat3|Hsp90aa1|Grhpr|Maoa|Acot3|Pcbd1|Ncaph2|Ehhadh|Gad2|Cbr1|Suclg1|Urod|Pdhb|Cpt2|Sms|Cd36|D2hgdh|Dld|Eci2|Acadm|Aldh3a2|Hsd17b10|Hccs|Acads|Bmpr1b|Gcdh|Alad|Hsd17b4|Sdha|Aldoa|Kmt5a|Ostc|Eno2|Gpd1|Auh|Slc22a5|Sdhd|Gapdhs|Serinc1|Hsd17b11|Hmgcl|Fh1|Acsl5|S100a10|Etfdh|G0s2|Bckdhb|Acsl4|Me1|Mdh…
38	HALLMARK_SPERMATOGENESIS	102	0.242202	0.46506	0.897231	Pcsk4|Hspa2|Ip6k1|Gpr182|Phf7|Npy5r|Ddx25|Zc2hc1c|Prkar2a|Pias2|Pcsk1n|Taldo1|Topbp1|Aurka|Zc3h14|Mllt10|Coil|Tle4|Scg5|Ezh2|Stam2|Ncaph|Gad1|Nek2|Acrbp|Cnih2|Pgs1|Vdac3|Nphp1|Psmg1|Zpbp|Pebp1|Parp2|Arl4a|Tsn|Nos1|Lpin1|She|Ccna1|Adcyap1|Gapdhs|Agfg1|Art3|Dbf4|Ccnb2|Mlf1|Csnk2a2|Clgn|Ace|Gstm5|Pacrg|Nf2|Jam3|Hspa4l|Mast2|Rad17|Hspa1l|Tekt2|Rfc4|Sirt1|Braf|Nefh|Ift88|Septin4|Map7|Clvs1|Clpb|Slc12a…
39	HALLMARK_MYC_TARGETS_V2	57	0.25437	0.568849	0.931491	Pprc1|Rrp12|Tmem97|Plk4|Srm|Nip7|Plk1|Tfb2m|Utp20|Ung|Nop56|Map3k6|Imp4|Ipo4|Supv3l1|Rrp9|Ndufaf4|Rcl1|Dusp2|Sord|Mybbp1a|Tbrg4|Bysl|Cdk4|Ppan|Hspd1|Nolc1|Npm1|Slc29a2|Exosc5|Gnl3|Wdr43|Nop16|Tcof1|Farsa|Phb|Aimp2|Mcm4|Hspe1|Nop2|Ddx18|Wdr74|Pus1|Prmt3|Las1l|Slc19a1|Pes1|Grwd1|Cbx3|Myc|Mrto4|Hk2|Rabepk|Mphosph10|Noc4l|Pa2g4|Dctpp1|Mcm5
40	HALLMARK_APICAL_JUNCTION	185	0.214644	0.561201	0.932134	Gamt|Mvd|Insig1|Nfasc|Akt2|Acta1|Ldlrap1|Myh10|Cadm2|Lama3|Cdh15|Layn|Speg|Myh9|Adam23|Parva|Cdh6|Cldn11|Stx4a|Epb41l2|Pkd1|Vcan|Slit2|Nlgn2|Cd276|Dmp1|Lamc2|Syk|Actn2|Ctnnd1|Itgb4|Plcg1|Ppp2r2c|Tspan4|Nlgn3|Mapk11|Pten|Cntn1|Hras|Rac2|Nectin3|Map4k2|Actg1|Cd34|Tjp1|Negr1|Nrap|Fscn1|Traf1|Col16a1|Nexn|Mdk|Irs1|Nrxn2|Rhof|Shroom2|Actn4|Crb3|Vcl|Cx3cl1|Dlg1|Cdh1|Myl12b|Atp1a3|Nectin1|Adra1b|Cd86|It…
41	HALLMARK_OXIDATIVE_PHOSPHORYLATION	198	-0.171707	0.985318	0.955888	Mtrr|Mrps30|Cyb5r3|Ech1|Ndufs7|Ndufv1|Mrps22|Timm9|Gpi1|Uqcrc1|Ndufs3|Atp5a1|Pdhx|Rhot2|Mdh2|Polr2f|Timm50|Alas1|Mrps11|Glud1|Dlat|Iscu|Immt|Surf1|Atp6v1e1|Cox10|Ndufb1|Mrpl11|Uqcrc2|Atp6v1h|Suclg1|Ndufa3|Pdhb|Ndufa1|Atp5k|Idh2|Ndufs2|Ndufa2|Oat|Mtx2|Tomm70a|Atp5b|Ndufa6|Dld|Sdhb|Acadm|Bdh2|Cox8a|Acat1|Hsd17b10|Atp6v1d|Vdac3|Mrpl35|Idh3a|Hccs|Cox15|Timm13|Cox7c|Cox5b|Atp5c1|Hspa9|Ndufa5|Ndufb2|Co…
42	HALLMARK_PROTEIN_SECRETION	94	-0.191405	0.932998	0.971338	Tsg101|Uso1|Ocrl|Ergic3|Pam|Sod1|Gla|Arf1|Ctsc|Ap2s1|Arcn1|Copb1|Stx12|Cope|Scamp3|Snx2|Vps45|Tspan8|Atp6v1h|Sec24d|Abca1|Sec31a|Copb2|Ppt1|Tmx1|Tom1l1|Galc|Tpd52|Bet1|Ykt6|M6pr|Arfip1|Gosr2|Rab22a|Lman1|Rab14|Clta|Rab2a|Mapk1|Rer1|Lamp2|Stx7|Stam|Adam10|Arfgef1|Kif1b|Mon2|Vps4b|Egfr|Cln5|Yipf6|Sgms1|Tmed2|Rab5a|Anp32e|Clcn3|Arfgap3|Sh3gl2|Ap2b1|Vamp4|Dnm1l|Gbf1|Cd63|Tmed10|Rab9|Napa|Sec22b|Cog2|…
43	HALLMARK_HEME_METABOLISM	173	-0.191952	0.916533	0.980819	Slc7a11|Ezh1|Tal1|Slc66a2|Slc25a38|Smox|Alas2|Kat2b|Pgls|Ucp2|Narf|Slc2a1|Ncoa4|Btg2|Bpgm|Sdcbp|Klf3|Ccnd3|Xpo7|Slc22a4|Igsf3|Cir1|Bcam|Hbb-bt|Tmcc2|Bsg|Rnf19a|Gclc|Fn3k|Hmbs|Mpp1|Urod|Bach1|Mkrn1|Vezf1|Hagh|Minpp1|Gclm|Cast|Fech|Gmps|Dcun1d1|Alad|Epor|Psmd9|Optn|Mospd1|Ccdc28a|Riok3|Mark3|Lrp10|Eif2ak1|Gypc|Synj1|Mgst3|Lamp2|Ctsb|Bnip3l|Add1|Top1|Adipor1|Mocos|Slc30a10|Cdc27|Nudt4|Ermap|Tcea1|Ag…
44	HALLMARK_WNT_BETA_CATENIN_SIGNALING	39	-0.253307	0.727592	0.981031	Fzd1|Lef1|Wnt6|Ctnnb1|Psen2|Ptch1|Jag1|Dll1|Cul1|Myc|Trp53|Axin2|Hdac5|Hdac2|Wnt5b|Axin1|Hey2|Ncstn|Notch4|Hey1|Nkd1|Fzd8|Notch1|Adam17|Kat2a|Gnai1|Ncor2|Csnk1e|Rbpj|Hdac11|Numb|Wnt1|Jag2|Dvl2|Tcf7|Maml1|Skp2|Ppard|Ccnd2
45	HALLMARK_PI3K_AKT_MTOR_SIGNALING	102	0.170519	0.981043	0.98129	Ecsit|Pfn1|Tnfrsf1a|Vav3|Prkag1|Actr3|Actr2|Arf1|Prkar2a|Slc2a1|Sqstm1|Nfkbib|Ngf|Cdkn1b|Csnk2b|Ripk1|Pak4|Akt1|Tiam1|Irak4|Pla2g12a|Hsp90b1|Them4|Rac1|Calr|Ywhab|Grb2|Smad2|Arpc3|Mapk1|Grk2|Ptpn11|Pik3r3|Lck|Atf1|Pikfyve|Sla|Cxcr4|Rit1|Nck1|Egfr|Ube2d3|Map3k7|Rps6ka1|Myd88|Mapkap1|Traf2|Tbk1|Prkaa2|Akt1s1|Cab39|Cdkn1a|Cdk4|Arhgdia|Fgf22|Cab39l|Stat2|Raf1|Cfl1|Il4|Ap2m1|Ralb|Map2k3|Sfn|Eif4e|Itpr…
46	HALLMARK_REACTIVE_OXYGEN_SPECIES_PATHWAY	48	-0.22463	0.865809	0.982702	Msra|Lsp1|Nqo1|Fes|Prnp|Glrx|Ptpa|Sod1|Srxn1|Gpx3|G6pdx|Hmox2|Gsr|Gclc|Ndufs2|Ndufa6|Pdlim1|Gclm|Ftl1|Ndufb4|Prdx4|Egln2|Mgst1|Cdkn2d|Gpx4|Txnrd1|Txn1|Stk25|Selenos|Prdx1|Ercc2|Cat|Glrx2|Sod2|Prdx2|Atox1|Scaf4|Txnrd2|Pfkp|Junb|Abcc1|Ipcef1|Lamtor5|Sbno2|Hhex|Mbp|Prdx6|Oxsr1
47	HALLMARK_MTORC1_SIGNALING	199	-0.18492	0.941368	0.983211	Slc7a11|Ddit4|Tes|Uchl5|Stip1|Serpinh1|Rpa1|Tomm40|Uso1|Pgm1|Psph|Slc6a6|Dhfr|Pitpnb|Gpi1|Aldoa|Nfyc|Lta4h|Tubg1|Actr3|Actr2|Egln3|Ccnf|Glrx|Gla|Psmd13|Ctsc|Psmc2|Plod2|Cdc25a|Ifi30|Slc2a1|Sqstm1|Slc2a3|Nfkbib|Nampt|Btg2|Hspa5|Cct6a|Ero1a|Aurka|Adipor2|Abcf2|Tpi1|Hk2|G6pdx|Gsr|Slc1a4|Immt|Rpn1|Psmc4|Gclc|Hmbs|Lgmn|Nmt1|Stc1|Hsp90b1|Fads2|Gapdh|Eno1|Psme3|Atp6v1d|Calr|Add3|Fgl2|Psmg1|Psmb5|Psmd12|…
48	HALLMARK_ANDROGEN_RESPONSE	94	-0.208713	0.849265	1	Camkk2|Insig1|Hmgcs1|Pmepa1|Idi1|Abhd2|Fads1|Rrp12|Hmgcr|Mak|Lifr|Xrcc5|Selenop|Scd2|Ell2|Abcc4|Srf|Elovl5|Itgav|Acsl3|Rps6ka3|Elk4|Dhcr24|Homer2|H1f0|Herc3|Zbtb10|Cdc14b|Scd1|Mertk|Plpp1|Zmiz1|Gnai3|Slc26a2|Cdk6|Sord|Map7|Hpgd|Tmem50a|Ube2i|Srp19|B2m|Pias1|Ptpn21|Spcs3|Xrcc6|Ank|Arid5b|Ube2j1|Uap1|Gucy1a1|Adamts1|Appbp2|Aldh1a3|Sat1|Lman1|B4galt1|Adrm1|Myl12a|Tpd52|Tsc22d1|Bmpr1b|Dnajb9|Stk39|Ak…
49	HALLMARK_UV_RESPONSE_DN	143	0.233413	0.419204	1	Insig1|Lpar1|Ldlr|Cdc42bpa|Kcnma1|Slc7a1|Sipa1l1|Smad7|Scn8a|Atxn1|Cacna1a|Dbp|Spop|Igfbp5|Adgrl2|Rgs4|Dlc1|Adora2b|Lamc1|Pparg|Itgb3|Map1b|Fhl2|Ptprm|Apbb2|Atp2b4|Erbb2|Ddah1|Pmp22|Pten|Abcc1|Mmp16|Togaram1|Nek7|Igf1r|Arhgef9|Kalrn|Dmac2l|Plpp3|Vldlr|Runx1|Rnd3|Col11a1|Prkca|Tjp1|Atrx|Celf2|Magi2|Dyrk1a|Gcnt1|Plcb4|Tent4a|Irs1|Fzd2|Zmiz1|Atrn|Aggf1|Dlg1|Ica1|Nr3c1|Scaf8|Prkce|Cdk13|Prdm2|Mios|Sr…
50	HALLMARK_TGF_BETA_SIGNALING	54	0.198355	0.923788	1	Pmepa1|Apc|Klf10|Smad7|Hipk2|Skil|Tgfbr1|Bmpr2|Smurf1|Sptbn1|Slc20a1|Acvr1|Junb|Ski|Smad1|Ppm1a|Tjp1|Smurf2|Rab31|Ppp1ca|Bcar3|Cdh1|Trim33|Arid4b|Ncor2|Nog|Cdk9|Map3k7|Smad3|Ube2d3|Tgif1|Rhoa|Wwtr1|Tgfb1|Xiap|Ppp1r15a|Eng|Furin|Thbs1|Id3|Id2|Bmpr1a|Smad6|Id1|Fnta|Fkbp1a|Bmp2|Cdkn1c|Hdac1|Ctnnb1|Ifngr2|Lefty2
